# Supplementary material for: Fish can show emotional fever: stress-induced hyperthermia in zebrafish
Source: PubMed Central journal article supplement (PMC4685827; doi:10.1098/rspb.2015.2266), 2015-11-22
Supplement: rspb20152266supp1.pdf [file rspb20152266supp1.pdf]

Supplementary figures

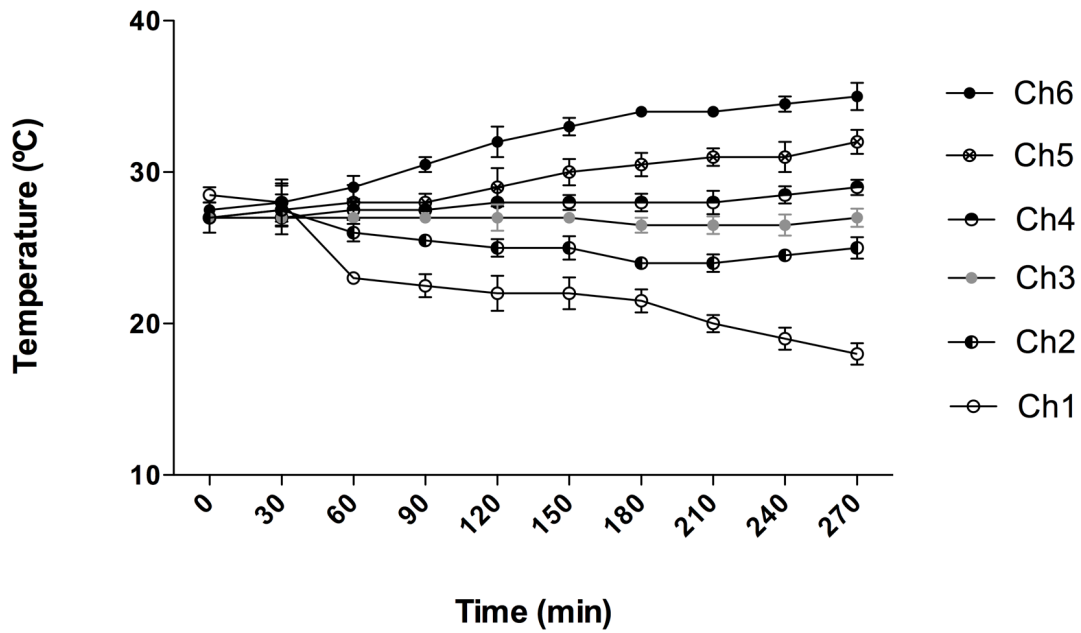

**SFigure 1. Gradient tank establishment.** After 4 hours the gradient established and remained constant for the time of the experiment. Final chamber temperatures were chamber 1:  $17.92 \pm 0.2$  °C, Chamber 2:  $24.83 \pm 0.26$  °C, Chamber 3:  $26.92 \pm 0.2$  °C, Chamber 4:  $28.75 \pm 0.27$  °C, Chamber 5:  $32$ °C and finally Chamber 6:  $35$ °C.

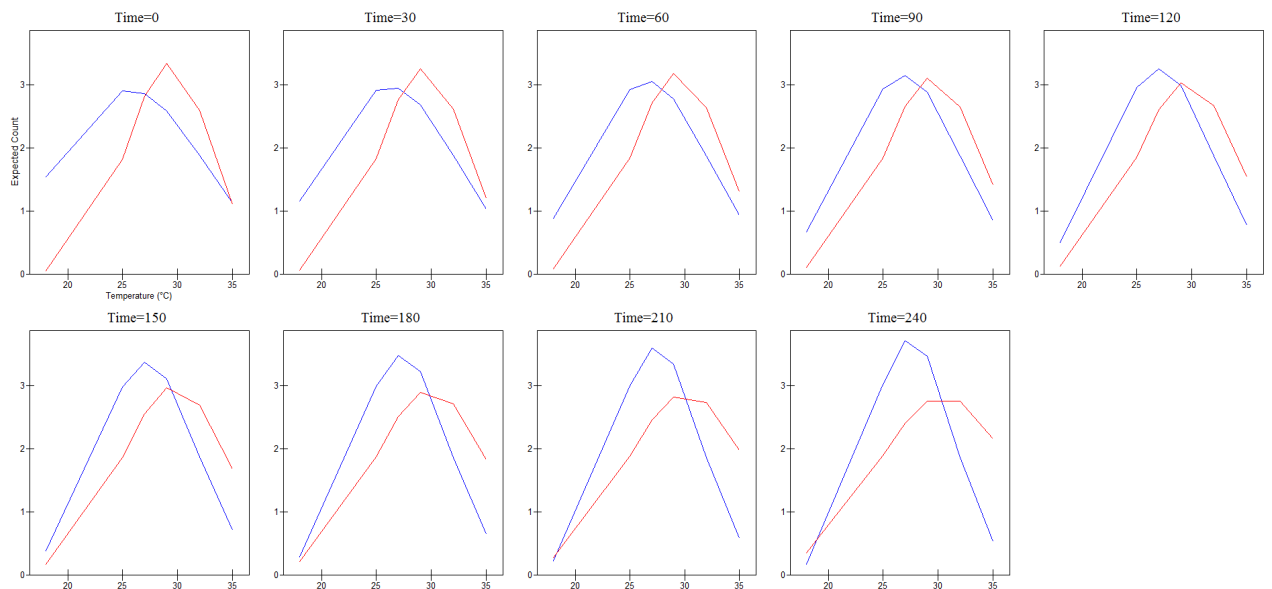

**SFigure 2. Detail of the changes in distribution of the groups across the temperature gradient over time.** The distributions are shown for each of the two treatments (control in blue, confinement in red) at each of the 30 min sampling times.

# Mean control vs sham (mean)

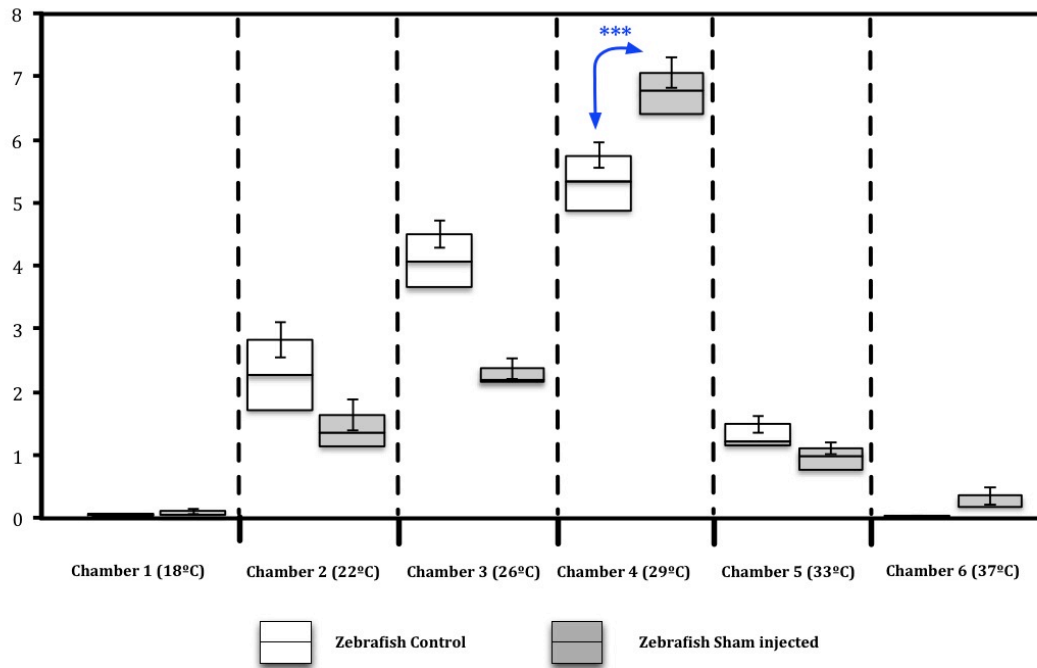

**Figure 3. Holding and PBS injection as a stress factor to induce hyperthermia in Zebrafish.**

Distribution of zebrafish per chamber of the thermal gradient tank after handling and i.p. injection .
